1                   **Alcohol Use among Emergency Medicine Department Patients in Tanzania: A**  
2                   **Comparative Analysis of Injury Versus Non-Injury Patients**

3  
4   **Authors and affiliations:**

5   Alena Pauley MScGH<sup>1</sup> – [alena.pauley@duke.edu](mailto:alena.pauley@duke.edu) (ORCID#: 0000-0002-7489-7469)

6   Emily C. Thatcher MPAS PA-C<sup>2</sup> – [emily.thatcher@duke.edu](mailto:emily.thatcher@duke.edu)

7   Joshua T. Sarafian<sup>1</sup> – [joshua.sarafian@duke.edu](mailto:joshua.sarafian@duke.edu)

8   Siddhesh Zadey MScGH<sup>1,2</sup> – [siddhesh.zadey@duke.edu](mailto:siddhesh.zadey@duke.edu)

9   Frida Shayo MD MMED<sup>3,4</sup> – [frishahappy@gmail.com](mailto:frishahappy@gmail.com)

10   Blandina T. Mmbaga, MD PhD<sup>3,4,5</sup> – [blaymt@gmail.com](mailto:blaymt@gmail.com)

11   Francis Sakita MD MMED<sup>3,4</sup> – [francis.sakita@gmail.com](mailto:francis.sakita@gmail.com)

12   Judith Boshe MD MMED<sup>3,4</sup> – [jboshe@live.com](mailto:jboshe@live.com)

13   João Ricardo Nickenig Vissoci MBA MSc PhD<sup>1,2</sup> – [jnv4@duke.edu](mailto:jnv4@duke.edu)

14   Catherine A. Staton, MD MScGH<sup>1,2</sup> – [catherine.lynch@duke.edu](mailto:catherine.lynch@duke.edu)

15  
16   1 Duke Global Health Institute, Duke University, Durham, NC USA

17   2 Duke Department of Surgery, Duke University Medical Center, Durham, NC USA

18   3 Kilimanjaro Christian Medical Center, Moshi, Tanzania

19   4 Kilimanjaro Christian Medical University College, Moshi, Tanzania

20   5 Kilimanjaro Clinical Research Institute, Moshi, Tanzania

21  
22   **Corresponding Author in event of publication:** [catherine.lynch@duke.edu](mailto:catherine.lynch@duke.edu) (CAS)

23   ORCID#: 0000-0002-6468-2894

24  
25   **Competing interests:** The authors declare no competing interests

27 **Author contributions:**

28 Conceptualization: CAS, FSh, FSa, JB

29 Methodology: AMP, CAS, JRNV

30 Formal analysis and investigation: CAS, FSh, FSa, JB

31 Data Collection: AMP, CAS

32 Writing - original draft preparation: AMP, ECT, SZ, JTS

33 Writing - review and editing: CAS, AMP, ECT, SZ, JTS

34 Funding acquisition: AMP, CAS

35 Supervision: CAS, JRNV, BTM

36

37 **Funding:** This project was funded by the Duke Global Health Institute Graduate Student funds, and the

38 Josiah Trent Foundation. Infrastructure built by NIH grant R01 AA027512 (PI Staton) was used to

39 support the data collection process for this grant to understand gender related aspects of alcohol use at

40 KCMC.

41

## 42 ABSTRACT

43 **Background:** Alcohol is a leading behavioral risk factor for death and disability worldwide. Tanzania has  
44 few trained personnel and resources for treating unhealthy alcohol use. In Emergency Medicine  
45 Departments (EMDs), alcohol is a well-known risk factor for injury patients. At Kilimanjaro Christian  
46 Medical Center (KCMC) in Moshi, Tanzania, 30% of EMD injury patients (IP) test positive for alcohol  
47 upon arrival to the ED. While the IP population is prime for EMD-based interventions, there is limited  
48 data on if non-injury patients (NIP) have similar alcohol use behavior and potentially benefit from  
49 screening and intervention as well.

50 **Methods:** This was a secondary analysis of a systematic random sampling of adult ( $\geq 18$  years old),  
51 KiSwahili speaking, KCMC EMD patients surveyed between October 2021 and May 2022. When  
52 medically stable and clinically sober, participants provided informed consent. Information on  
53 demographics (sex, age, years of education, type of employment, income, marital status, tribe, and  
54 religion), injury status, self-reported alcohol use, and Alcohol Use Disorder (AUD) Identification Test  
55 (AUDIT) scores were collected. Descriptive statistics were analyzed in Rstudio using frequencies and  
56 proportions.

57 **Results:** Of the 376 patients enrolled, 59 (15.7%) presented with an injury. The IP and NIP groups did  
58 not differ in any demographics except sex, an expected difference as females were intentionally  
59 oversampled in the original study design. The mean [SD] AUDIT score (IP: 5.8 [6.6]; NIP: 3.9 [6.1]),  
60 drinks per week, and proportion of AUDIT  $\geq 8$  was higher for IP (IP: 37%; NIP: 21%). However, alcohol  
61 preferences, drinking quantity, weekly expenditure on alcohol, perceptions of unhealthy alcohol use,  
62 attempts and reasons to quit, and treatment seeking were comparable between IPs and NIPs.

63 **Conclusion:** Our data suggests 37% of injury and 20% of non-injury patients screen positive for harmful  
64 or hazardous drinking in our setting. An EMD-based alcohol treatment and referral process could be  
65 beneficial to reduce this growing behavioral risk factor in non-injury as well as injury populations.

## 66 Introduction

67 Alcohol use is a significant contributor to death and disability globally, accounting for  
68 approximately 3 million deaths and 5.1% of disability-adjusted life years (DALYs) annually (1).  
69 This significant burden of global DALYs comes in part from the disproportionate effect on  
70 young people; in 2016, alcohol use was the primary risk factor for premature death and disability  
71 among those aged 15-49 years (1). These numbers are underpinned by alcohol's association with  
72 injury and disease, having been linked as a causal factor in more than 200 acute and chronic  
73 diseases and injury conditions, like liver disease, cardiovascular disease, and certain cancers (2–  
74 7). Alcohol misuse has also been associated with depression, anxiety, and phobias, with the co-  
75 occurrence of depression and alcohol misuse in particular linked to a more severe prognosis for  
76 each (8,9). Additionally, beyond physical and mental harm, alcohol use can cause notable social  
77 and economic losses for individuals and the larger society, such as increased violence and  
78 aggressive behaviors, unsafe sexual practices, and an estimated 2.6% reduction in the global  
79 gross domestic product (10–14). Fortunately, alcohol intake is a modifiable risk factor, as such,  
80 there is an opportunity to reduce much of the associated harm with social and behavioral  
81 changes.

82 In low- and middle-income countries (LMICs), alcohol-related harm has been increasing,  
83 especially within Tanzania, a country that sits on the Eastern edge of the African continent. In  
84 Tanzania, alcohol use disorder (AUD) is prevalent in 6.8% of Tanzanian citizens, which is nearly  
85 double (3.7%) the WHO African Region overall(1). The burden associated with alcohol use is  
86 skewed by gender, with men experiencing approximately three times the attributable burden of  
87 disease compared to women (15,16) This proportion is seen in Tanzania as well. In 2016, the  
88 prevalence of AUDs among those aged 15 and older in Tanzania was 11.5% for men and 2.2%

89 for women(1). This is roughly 1.8 times the rate for men and more than 3 times the rate for  
90 women than in neighboring Malawi(1).

91 Moshi, a popular tourist town located at the base of Mount Kilimanjaro in Northern  
92 Tanzania, has seen a higher prevalence of alcohol use and associated disease and injury statuses  
93 in recent years (17–19). This increase in use is in part due to a strong drinking culture and  
94 custom of early alcohol initiation in minors for members of the Chagga ethnic group, who  
95 constitute the majority of local inhabitants (20,21). Standing also as contributing factors is  
96 alcohol’s ready availability mixed with its low cost and recently more disposable income among  
97 inhabitants of the region (17,20,22). In Moshi, high rates of alcohol use and alcohol-related  
98 harm, in combination with the lack of trained health professionals and relevant resources, leads  
99 to inadequate treatment availability (23).

100 As a means to reduce alcohol-related harm, alcohol-reduction interventions have been  
101 implemented in Emergency Medicine Department (EMD) settings given the strong, well-  
102 established association between alcohol use and injuries (24). The consumption of alcohol  
103 impairs cognitive functioning leading to an inhibition of perception, reflexes, and fine motor  
104 skills (25). This inhibition can lead to more dangerous behaviors like driving under the influence,  
105 interpersonal violence, and self-harm, thereby impacting the likelihood of both intentional and  
106 unintentional injuries (24,26). EMDs typically stand as the first line of care for emergent injury  
107 patients, and as such, EMDs tend to see a high proportion of patients with above-average regular  
108 alcohol intake (27). At the Kilimanjaro Christian Medical Center (KCMC) in Moshi,  
109 approximately 30% of EMD injury patients (IP) tested positive for alcohol use on arrival to the  
110 EMD, a significantly larger proportion than the general population (28). As such, the EMD has

111 initiated a screening and culturally adapted brief intervention for treatment currently undergoing  
112 effectiveness testing specifically for injury patients (29,30).

113 While there is data on this IP population, few, if any, studies provide data on alcohol  
114 usage among non-injury patients (NIP) in comparison to IPs. Furthermore, how and if alcohol  
115 use practices differ between IPs and NIPs is not well-studied. Given this gap in the literature, this  
116 study aims to compare rates of alcohol use and alcohol-related behaviors between KCMC EMD  
117 IPs and NIPs in order to guide future alcohol-related EMD interventions.

## 118 Methods

### 119 Study Design

120 This was a secondary analysis of a systematic random sampling study of KCMC EMD  
121 patients surveyed between October 2021 and May 2022. The primary study sought to describe  
122 gender differences in unhealthy alcohol use behaviors. As such, the EMD was chosen as a study  
123 location because of the high association between injuries and alcohol consumption (28,31). This  
124 current analysis seeks to compare alcohol consumption among IPs and NIPs who attend  
125 KCMC's EMD. Thus, demographic factors, self-reported alcohol use, and AUDIT scores were  
126 assessed between these two patient populations.

### 127 Study Sample

128 Patients were enrolled at the KCMC EMD study site, which is situated in Moshi,  
129 Tanzania. All enrolled participants met the following eligibility criteria: 1) were 18 years of age  
130 or older, 2) had the capacity to give informed consent, 3) received initial care at KCMC  
131 Emergency Department, 4) were conversant in Kiswahili. Patients who were prisoners were  
132 excluded from our study due to an increased medicolegal risk, concern for power dynamics

133 given their incarcerated state, and their current limited access to alcohol during incarceration. For  
134 the safety of the data collection team, patients who tested positive for COVID-19 were also not  
135 approached. A patient was determined capable of providing informed consent if they were  
136 medically stabilized, clinically sober, and well enough to complete the survey verbally on their  
137 own. Those who were extremely ill or injured upon initial presentation were re-evaluated by the  
138 research team within 24 hours of arriving at KCMC or before discharge, whichever came first.  
139 Those who remained unable to consent within this time frame were excluded from study  
140 participation.

141 In addition to assessing gender differences, the original study aimed to compare rates of  
142 unhealthy alcohol use among females in the EMD and the reproductive health center, which  
143 required a higher proportion of female than male EMD subjects because of lower hypothesized  
144 prevalence of alcohol misuse. Thus, the data analyzed here is representative of the EMD  
145 population when separated by gender, but not when taken en masse. However, for this secondary  
146 analysis, sufficient subjects were enrolled overall to estimate the prevalence of AUDIT scores  $\geq$   
147 8 (described more in-depth below) among both IPs and NIPs within a 10% margin of error and  
148 90% confidence level. Ethical approval for this study was obtained from the Kilimanjaro  
149 Christian Medical University College Ethics Review Board, the Tanzanian National Institute of  
150 Medical Research, and the Duke University Institutional Review Board prior to the initiation of  
151 data collection.

## 152 Data Collection

153 Patients seeking care at KCMC's EMD were enrolled Monday through Friday at peak  
154 attendance hours, 10:00 am until 6:00 pm local time. Patients who came in overnight, or were  
155 initially intoxicated or in critical condition were followed up over 24 hours to determine if they

156 were able to provide informed consent. If so, and if agreeing to study participation, these patients  
157 were likewise enrolled. During the data collection period, enrollment of female patients remained  
158 consistent, but enrollment of male patients was paused from January 1st, 2021 until March 31st,  
159 2022, awaiting regulatory approval of increased male sample size. To maintain a representative,  
160 systematic random sample and meet planned enrollment goals, every female but every third male  
161 presenting to the EMD for care was approached about study participation since the EMD sees  
162 significantly more males than females.

163         If patients met eligibility criteria, they were screened and approached once medically  
164 stabilized and offered study participation. Research assistants, who were IRB approved and  
165 trained in Good Clinical Practices, explained the research protocol and informed consent to all  
166 interested patients. Once enrolled, patients were asked questions related to their demographics,  
167 current alcohol intake, alcohol-related behaviors, consequences of their drinking, and depressive  
168 symptoms. All data were collected in Kiswahili by a team of three Tanzanian research assistants  
169 (two female and one male). For data collection, the male research assistant surveyed all male  
170 participants, and the female research assistants surveyed all female participants. This gender-  
171 matching was done to encourage open and honest reporting of patients' experiences with alcohol  
172 based on local culture and research team experience (32). Regulatory approval for the primary  
173 data collection project was obtained from the Kilimanjaro Christian Medical Center Ethics  
174 Committee, the Tanzanian National Institution of Medical Research (NIMR), and the Duke  
175 University Institutional Review Board. As much as possible, data was maintained in a de-  
176 identified manner and shared by data share agreement; personal health information was used for  
177 screening and enrollment, but data were collected, stored and analyzed in an de-identified  
178 manner.



## 179 Variables

180 Information on patients' demographics (sex, age, years of education, type of  
181 employment, income, marital status, tribe, and religion), injury status, and self-reported alcohol  
182 use were collected. All demographic and self-reported alcohol use questions had previously been  
183 translated into Kiswahili by our Tanzanian research team. Additionally, the Alcohol Use  
184 Disorder Identification Test (AUDIT), Drinkers' Inventory of Consequences, and the Patient  
185 Health Questionnaire 9 (PHQ-9) were the three relevant scales administered.

186 AUDIT is a commonly used 10-question tool for measuring alcohol consumption and  
187 alcohol-related problems (33,34). The AUDIT tool ranges from 0 to 40, with lower values  
188 indicating low-risk consumption and higher values suggesting alcohol dependence. Both locally  
189 and globally, scores greater than or equal to 8 are clinically significant for harmful or hazardous  
190 drinking (HHD), meaning an individual is at risk for suffering adverse health outcomes as a  
191 result of their alcohol intake, (34–39) and was thus used as a cut-off point in this analysis. DrInC  
192 (which ranges from 0 - 50) is a 50-question survey that measures alcohol-related consequences  
193 across five domains: interpersonal, intrapersonal, social consequences, impulse control, and  
194 physical (40). While there is no clinically significant cut-off score, higher scores indicate more  
195 significant consequences for an individual (41). Finally, PHQ-9 is a diagnostic tool used to  
196 identify the existence and severity of depression (42). This scale ranges from 0 to 27, with higher  
197 values indicating increasingly severe depressive symptoms. Scores of 9 or greater were found to  
198 be the optimal cut-off score for identifying clinical depression in the KiSwahili-translated  
199 version of the PHQ-9 (43) and thus was the cut-off point used here. All three scales had  
200 previously been cross-culturally adapted, psychometrically validated, and clinically tested in the  
201 local context (39,43,44).

## 202            Data Analysis

203            Data on patients' demographics, injury status, self-reported alcohol use, and AUDIT,  
204 DrInC, and PHQ-9 scores were analyzed using descriptive frequencies and proportions. All  
205 variables were categorical except for measures of income, education status, and the three survey  
206 tools which were continuous. AUDIT and PHQ-9 scores were dichotomized according to the cut-  
207 off values discussed previously; AUDIT scores of 8 and greater were categorized as HHD, while  
208 scores less than 8 were classified as not HHD. PHQ-9 scores of 9 and greater were categorized as  
209 a positive screen for depression and scores less than 9 were classified screening negative.  
210 Missing data was minimal at 1 to 2 missing data points per variable with the exception of  
211 personal and household income as several participants were hesitant to disclose their financial  
212 status to research staff. All data were analyzed in RStudio (version 1.4) using user-created and  
213 validated R-Packages.

## 214 Results

### 215 Patient Demographics

216 During the 8 months of data collection from October 1st until May 31st, 376 EMD  
217 patients were surveyed, of which 59 (15.7%) presented with injuries and 317 (84.3%) presented  
218 for non-injury-related reasons, including but not limited to fever, headache, stomach ache, body  
219 numbness, or body swelling. As expected based on our sampling strategy, females account for  
220 70.3% of the data collected. Across all groups, most patients were Christian and from the Chagga  
221 tribe (78% and 47%, respectively). Roughly half (46%) of participants were employed at the  
222 time of enrollment (10% were students and held no other employment, and 43% were  
223 unemployed). This demographic data can be seen in Table 1 below.

Table 1: Demographics of EMD Patients

| ED Demographics by Injury Status and Gender                     | Overall, N = 374 <sup>1</sup> | Injury Patients N = 59 <sup>1</sup> | Non-Injury Patients N = 315 <sup>1</sup> | Female Injury Patients, N = 26 <sup>1</sup> | Female Non-Injury Patients, N = 237 <sup>1</sup> | Male Injury Patients, N = 33 <sup>1</sup> | Male Non-Injury Patients, N = 78 <sup>1</sup> |
|-----------------------------------------------------------------|-------------------------------|-------------------------------------|------------------------------------------|---------------------------------------------|--------------------------------------------------|-------------------------------------------|-----------------------------------------------|
| <b>Years of Education, missing: 2</b>                           | 7.73 (5.05)                   | 8.27 (4.82)                         | 7.63 (5.10)                              | 5.92 (3.95)                                 | 6.60 (4.56)                                      | 10.12 (4.68)                              | 10.71 (5.41)                                  |
| <b>Personal Income (TZS) per month, missing: 58</b>             | 254,939.87 (439,577.43)       | 225,384.62 (316,503.07)             | 259,101.08 (454,532.08)                  | 186,153.85 (270,692.84)                     | 239,443.97 (442,816.79)                          | 303,846.15 (393,139.89)                   | 360,444.44 (503,929.81)                       |
| <b>Household Income (TZS) per month, missing: 59</b>            | 435,968.25 (510,222.82)       | 397,763.16 (492,331.32)             | 441,209.39 (513,270.52)                  | 362,115.38 (529,955.04)                     | 433,276.60 (478,412.29)                          | 475,000.00 (409,267.64)                   | 485,595.24 (681,751.87)                       |
| <b>Religion</b>                                                 |                               |                                     |                                          |                                             |                                                  |                                           |                                               |
| Christian                                                       | 290 / 374 (78%)               | 50 / 59 (85%)                       | 240 / 315 (76%)                          | 24 / 26 (92%)                               | 187 / 237 (79%)                                  | 26 / 33 (79%)                             | 53 / 78 (68%)                                 |
| Muslim                                                          | 75 / 374 (20%)                | 8 / 59 (14%)                        | 67 / 315 (21%)                           | 2 / 26 (7.7%)                               | 44 / 237 (19%)                                   | 6 / 33 (18%)                              | 23 / 78 (29%)                                 |
| None                                                            | 8 / 374 (2.1%)                | 1 / 59 (1.7%)                       | 7 / 315 (2.2%)                           | 0 / 26 (0%)                                 | 5 / 237 (2.1%)                                   | 1 / 33 (3.0%)                             | 2 / 78 (2.6%)                                 |
| Other                                                           | 1 / 374 (0.3%)                | 0 / 59 (0%)                         | 1 / 315 (0.3%)                           | 0 / 26 (0%)                                 | 1 / 237 (0.4%)                                   | 0 / 33 (0%)                               | 0 / 78 (0%)                                   |
| <b>Marital Status, missing: 1</b>                               |                               |                                     |                                          |                                             |                                                  |                                           |                                               |
| Divorced or Separated                                           | 23 / 373 (6.2%)               | 2 / 59 (3.4%)                       | 21 / 314 (6.7%)                          | 0 / 26 (0%)                                 | 14 / 237 (5.9%)                                  | 2 / 33 (6.1%)                             | 7 / 77 (9.1%)                                 |
| Living together with a partner but not in a registered marriage | 37 / 373 (9.9%)               | 9 / 59 (15%)                        | 28 / 314 (8.9%)                          | 2 / 26 (7.7%)                               | 23 / 237 (9.7%)                                  | 7 / 33 (21%)                              | 5 / 77 (6.5%)                                 |
| Living together with a partner in a registered marriage         | 181 / 373 (49%)               | 30 / 59 (51%)                       | 151 / 314 (48%)                          | 14 / 26 (54%)                               | 110 / 237 (46%)                                  | 16 / 33 (48%)                             | 41 / 77 (53%)                                 |
| Never Married or Single                                         | 77 / 373 (21%)                | 13 / 59 (22%)                       | 64 / 314 (20%)                           | 5 / 26 (19%)                                | 49 / 237 (21%)                                   | 8 / 33 (24%)                              | 15 / 77 (19%)                                 |
| Refused/Do not know                                             | 1 / 373 (0.3%)                | 0 / 59 (0%)                         | 1 / 314 (0.3%)                           | 0 / 26 (0%)                                 | 0 / 237 (0%)                                     | 0 / 33 (0%)                               | 1 / 77 (1.3%)                                 |
| Widowed                                                         | 54 / 373 (14%)                | 5 / 59 (8.5%)                       | 49 / 314 (16%)                           | 5 / 26 (19%)                                | 41 / 237 (17%)                                   | 0 / 33 (0%)                               | 8 / 77 (10%)                                  |
| <b>Employment Status</b>                                        |                               |                                     |                                          |                                             |                                                  |                                           |                                               |
| Employed                                                        | 173 / 374 (46%)               | 31 / 59 (53%)                       | 142 / 315 (45%)                          | 11 / 26 (42%)                               | 110 / 237 (46%)                                  | 20 / 33 (61%)                             | 32 / 78 (41%)                                 |
| Unemployed                                                      | 162 / 374 (43%)               | 22 / 59 (37%)                       | 140 / 315 (44%)                          | 11 / 26 (42%)                               | 99 / 237 (42%)                                   | 11 / 33 (33%)                             | 41 / 78 (53%)                                 |
| Student                                                         | 39 / 374 (10%)                | 6 / 59 (10%)                        | 33 / 315 (10%)                           | 4 / 26 (15%)                                | 28 / 237 (12%)                                   | 2 / 33 (6.1%)                             | 5 / 78 (6.4%)                                 |
| <b>Tribe</b>                                                    |                               |                                     |                                          |                                             |                                                  |                                           |                                               |
| Chagga                                                          | 176 / 374 (47%)               | 31 / 59 (53%)                       | 145 / 315 (46%)                          | 14 / 26 (54%)                               | 108 / 237 (46%)                                  | 17 / 33 (52%)                             | 37 / 78 (47%)                                 |
| Iraq                                                            | 13 / 374 (3.5%)               | 3 / 59 (5.1%)                       | 10 / 315 (3.2%)                          | 1 / 26 (3.8%)                               | 8 / 237 (3.4%)                                   | 2 / 33 (6.1%)                             | 2 / 78 (2.6%)                                 |
| Maasai                                                          | 18 / 374 (4.8%)               | 2 / 59 (3.4%)                       | 16 / 315 (5.1%)                          | 0 / 26 (0%)                                 | 13 / 237 (5.5%)                                  | 2 / 33 (6.1%)                             | 3 / 78 (3.8%)                                 |

|                     |                 |               |                 |               |                 |               |               |
|---------------------|-----------------|---------------|-----------------|---------------|-----------------|---------------|---------------|
| Mmeru               | 18 / 374 (4.8%) | 4 / 59 (6.8%) | 14 / 317 (4.4%) | 3 / 26 (12%)  | 11 / 237 (4.6%) | 1 / 33 (3.0%) | 3 / 78 (3.8%) |
| Muha or Non-African | 3 / 374 (0.8%)  | 1 / 59 (1.7%) | 2 / 315 (0.6%)  | 1 / 26 (3.8%) | 2 / 237 (0.8%)  | 0 / 33 (0%)   | 0 / 78 (0%)   |
| Nyaturu             | 5 / 374 (1.3%)  | 0 / 59 (0%)   | 5 / 315 (1.6%)  | 0 / 26 (0%)   | 5 / 237 (2.1%)  | 0 / 33 (0%)   | 0 / 78 (0%)   |
| Other African       | 64 / 374 (17%)  | 7 / 59 (12%)  | 57 / 315 (19%)  | 5 / 26 (19%)  | 50 / 237 (21%)  | 2 / 33 (6.1%) | 7 / 78 (9.0%) |
| Pare                | 44 / 374 (12%)  | 8 / 59 (14%)  | 36 / 315 (11%)  | 2 / 26 (7.7%) | 24 / 237 (10%)  | 6 / 33 (18%)  | 12 / 78 (15%) |
| Sambaa              | 15 / 374 (4.0%) | 2 / 59 (3.4%) | 13 / 315 (4.1%) | 0 / 26 (0%)   | 6 / 237 (2.5%)  | 2 / 33 (6.1%) | 7 / 78 (9.0%) |
| Sukuma              | 18 / 374 (4.8%) | 1 / 59 (1.7%) | 17 / 315 (5.4%) | 0 / 26 (0%)   | 10 / 237 (4.2%) | 1 / 33 (3.0%) | 7 / 78 (9.0%) |

## 226 Alcohol Use Characteristics of EMD Patients

227 In following the intention of this paper to compare rates of alcohol use and alcohol-  
228 related behaviors across IPs and NIPs presenting to KCMC's EMD, differences in AUDIT,  
229 PHQ-9, and DrInC scores were examined across these two groups. IPs had higher average [SD]  
230 AUDIT scores (5.76 [6.6]) than NIPs (3.93 [6.1]), although a sizeable proportion of individuals  
231 with HHD (AUDIT  $\geq$  8) were present in both patient groups (37% of IPs and 21% of NIPs).  
232 Average DrInC scores were higher in the IP population (12.92 [17.54]) than the NIP population  
233 (9.19 [15.99]), but mean PHQ-9 scores were greater among NIPs (6.60 [5.17]) than IPs (4.12  
234 [4.14]). Following this, a greater percentage of NIPs (22% of NIPs and of 8.5% of IPs) screened  
235 positively for depression (PHQ-9  $\geq$  9).

236 Other markers of alcohol use, including drinking frequency and drinking quantity, were  
237 also explored. AUDIT scores were higher among IPs; however, a greater proportion of NIPs  
238 appeared to drink more frequently (5.0% of NIPs but 1.7% of IPs reportedly drank every day or  
239 multiple times per day), and in unhealthy quantities (5.1% of NIPs but 3.4% of IPs drank 5 or  
240 more bottles per sitting). Other characteristics were comparable across both patient groups;  
241 roughly half (47% of IPs and 52% of NIPs) had previously attempted to quit drinking, and a  
242 tenth (14% of IPs and 8.9% of NIPs) had sought treatment for alcohol use, with personal reasons  
243 (39% of IPs and 42% of NIPs) cited as the primary motivation to quit. Most participants noted  
244 beer (31% of IPs and 24% of NIPs) as their alcoholic drink of choice, and 1.7% of IPs and 1.9%  
245 of NIPs spent more than 50,000 TZS (\$21.42 USD) on alcohol per week. To put this amount into  
246 context, the average reported personal income for the overall study population is 254,939.87 TZS  
247 (\$109.32 USD) per month or 58,674.31 TZS (\$25.16 USD) per week.

248 This data was separated further by males and females to account for how overarching  
249 sex-based differences in alcohol use could impact trends among IPs and NIPs. Of those with  
250 injuries, roughly half were females (44%), compared to the non-injury group, in which females  
251 constituted the majority (75%). Overall, males had higher average AUDIT and DrInC scores but  
252 lower PHQ-9 scores than female patients regardless of injury status. The average AUDIT score  
253 was 7.58 [7.27] for male IPs and 6.68 [8.59] for male NIPs. This stands in comparison to  
254 females; 3.46 [5.03] and 3.03 [4.76] were the average AUDIT score for female IPs and NIPs,  
255 respectively. These trends are echoed in the proportion of patients who tested positive for HHD.  
256 For males, 48% of those with injuries and 35% of those without injuries screened positively for  
257 HHD, whereas for females, 23% of those with injuries and 16% of those without injuries had  
258 AUDIT scores greater than or equal to 8.

259 Males also had average DrInC scores (16.30 [19.32] for male IPs and 14.28 [20.46] for  
260 male NIPs) which were higher than their female counterparts. For females, average DrInC scores  
261 were 8.62 [14.19] for female IPs and 7.49 [13.90] for female NIPs. While males had the highest  
262 AUDIT and DrInC scores, females were more likely to screen positively for depression (those  
263 with a PHQ-9  $\geq$  9 constituted 15% of female IPs and 26% of female NIPs) compared to males  
264 (3% of male IPs and 10% of male NIPs had a PHQ-9  $\geq$  9). Of all groups, female NIPs had the  
265 highest average PHQ-9 score (7.30 [5.16]), followed by female IPs with an average of 6.62  
266 [3.94]. These reports and others can be seen in Table 2 below.

Table 2: Alcohol Use Characteristics of EMD Patients

| ED Demographics by Injury Status and Gender | Overall, N = 374 <sup>1</sup> | Injury Patients N = 59 <sup>1</sup> | Non-Injury Patients N = 315 <sup>1</sup> | Female Injury Patients, N = 26 <sup>1</sup> | Female Non-Injury Patients, N = 237 <sup>1</sup> | Male Injury Patients, N = 33 <sup>1</sup> | Male Non-Injury Patients, N = 78 <sup>1</sup> |
|---------------------------------------------|-------------------------------|-------------------------------------|------------------------------------------|---------------------------------------------|--------------------------------------------------|-------------------------------------------|-----------------------------------------------|
| <b>AUDIT Score</b>                          | 4.22 (6.25)                   | 5.76 (6.66)                         | 3.94 (6.13)                              | 3.46 (5.03)                                 | 3.03 (4.76)                                      | 7.58 (7.27)                               | 6.68 (8.59)                                   |
| <b>DrInC Score</b>                          | 9.76 (16.30)                  | 12.92 (17.54)                       | 9.17 (16.01)                             | 8.62 (14.19)                                | 7.49 (13.90)                                     | 16.30 (19.32)                             | 14.28 (20.46)                                 |
| <b>PHQ-9 Score</b>                          | 6.21 (5.11)                   | 4.12 (4.14)                         | 6.60 (5.18)                              | 6.62 (3.94)                                 | 7.30 (5.16)                                      | 2.15 (3.15)                               | 4.49 (4.68)                                   |
| <b>Alcohol Preferences</b>                  |                               |                                     |                                          |                                             |                                                  |                                           |                                               |
| Beer                                        | 93 / 374 (25%)                | 18 / 59 (31%)                       | 75 / 315 (24%)                           | 5 / 26 (19%)                                | 59 / 237 (25%)                                   | 13 / 33 (39%)                             | 16 / 78 (21%)                                 |
| Changaa, Dadii, Gongo, Piwa                 | 8 / 374 (2.1%)                | 0 / 59 (0%)                         | 8 / 315 (2.5%)                           | 0 / 26 (0%)                                 | 5 / 237 (2.1%)                                   | 0 / 33 (0%)                               | 3 / 78 (3.8%)                                 |
| Light Beer                                  | 39 / 374 (10%)                | 3 / 59 (5.1%)                       | 36 / 315 (11%)                           | 0 / 26 (0%)                                 | 20 / 237 (8.4%)                                  | 3 / 33 (9.1%)                             | 16 / 78 (21%)                                 |
| Liquor/Spirits                              | 11 / 374 (2.9%)               | 2 / 59 (3.4%)                       | 9 / 315 (2.9%)                           | 0 / 26 (0%)                                 | 3 / 237 (1.3%)                                   | 2 / 33 (6.1%)                             | 6 / 78 (7.7%)                                 |
| Mbege                                       | 55 / 374 (15%)                | 10 / 59 (17%)                       | 45 / 315 (14%)                           | 5 / 26 (19%)                                | 35 / 237 (15%)                                   | 5 / 33 (15%)                              | 10 / 78 (13%)                                 |
| None                                        | 111 / 374 (30%)               | 15 / 59 (25%)                       | 96 / 315 (30%)                           | 12 / 26 (46%)                               | 86 / 237 (36%)                                   | 3 / 33 (9.1%)                             | 10 / 78 (13%)                                 |
| Other                                       | 2 / 374 (0.5%)                | 0 / 59 (0%)                         | 2 / 315 (0.6%)                           | 0 / 26 (0%)                                 | 2 / 237 (0.8%)                                   | 0 / 33 (0%)                               | 0 / 78 (0%)                                   |
| Refused/Do not know                         | 5 / 374 (1.3%)                | 0 / 59 (0%)                         | 5 / 315 (1.6%)                           | 0 / 26 (0%)                                 | 0 / 237 (0%)                                     | 0 / 33 (0%)                               | 5 / 78 (6.4%)                                 |
| Ulanzi                                      | 4 / 374 (1.1%)                | 1 / 59 (1.7%)                       | 3 / 315 (1.0%)                           | 0 / 26 (0%)                                 | 2 / 237 (0.8%)                                   | 1 / 33 (3.0%)                             | 1 / 78 (1.3%)                                 |
| Wine                                        | 46 / 374 (12%)                | 10 / 59 (17%)                       | 36 / 315 (11%)                           | 4 / 26 (15%)                                | 25 / 237 (11%)                                   | 6 / 33 (18%)                              | 11 / 78 (14%)                                 |
| <b>Drinking Frequency, missing: 1</b>       |                               |                                     |                                          |                                             |                                                  |                                           |                                               |
| 0 times/week                                | 119 / 373 (32%)               | 16 / 58 (28%)                       | 103 / 315 (33%)                          | 12 / 26 (46%)                               | 87 / 237 (37%)                                   | 4 / 32 (12%)                              | 16 / 78 (21%)                                 |
| 1-2 times/week                              | 185 / 373 (50%)               | 24 / 58 (41%)                       | 161 / 315 (51%)                          | 6 / 26 (23%)                                | 120 / 237 (51%)                                  | 18 / 32 (56%)                             | 41 / 78 (53%)                                 |
| 3-4 times/week                              | 47 / 373 (13%)                | 16 / 58 (28%)                       | 31 / 315 (9.8%)                          | 8 / 26 (31%)                                | 18 / 237 (7.6%)                                  | 8 / 32 (25%)                              | 13 / 78 (17%)                                 |
| 5-6 times/week                              | 4 / 373 (1.1%)                | 1 / 58 (1.7%)                       | 3 / 315 (1.0%)                           | 0 / 26 (0%)                                 | 2 / 237 (0.8%)                                   | 1 / 32 (3.1%)                             | 1 / 78 (1.3%)                                 |
| Every day                                   | 14 / 373 (3.8%)               | 0 / 58 (0%)                         | 14 / 315 (4.4%)                          | 0 / 26 (0%)                                 | 10 / 237 (4.2%)                                  | 0 / 32 (0%)                               | 4 / 78 (5.1%)                                 |
| Multiple times a day                        | 3 / 373 (0.8%)                | 1 / 58 (1.7%)                       | 2 / 315 (0.6%)                           | 0 / 26 (0%)                                 | 0 / 237 (0%)                                     | 1 / 32 (3.1%)                             | 2 / 78 (2.6%)                                 |
| Refused/Do not know                         | 1 / 373 (0.3%)                | 0 / 58 (0%)                         | 1 / 315 (0.3%)                           | 0 / 26 (0%)                                 | 0 / 237 (0%)                                     | 0 / 32 (0%)                               | 1 / 78 (1.3%)                                 |
| <b>Drinking Quantity, missing: 1</b>        |                               |                                     |                                          |                                             |                                                  |                                           |                                               |
| 0 drinks                                    | 119 / 373 (32%)               | 16 / 58 (28%)                       | 103 / 315 (33%)                          | 12 / 26 (46%)                               | 88 / 237 (37%)                                   | 4 / 32 (12%)                              | 15 / 78 (19%)                                 |
| 1-2 bottles                                 | 172 / 373 (46%)               | 24 / 58 (41%)                       | 148 / 315 (47%)                          | 8 / 26 (31%)                                | 106 / 237 (45%)                                  | 16 / 32 (50%)                             | 42 / 78 (54%)                                 |
| 3-4 bottles                                 | 62 / 373 (17%)                | 16 / 58 (28%)                       | 46 / 315 (15%)                           | 6 / 26 (23%)                                | 35 / 237 (15%)                                   | 10 / 32 (31%)                             | 11 / 78 (14%)                                 |
| 5-6 bottles                                 | 13 / 373 (3.5%)               | 1 / 58 (1.7%)                       | 12 / 315 (3.8%)                          | 0 / 26 (0%)                                 | 7 / 237 (3.0%)                                   | 1 / 32 (3.1%)                             | 5 / 78 (6.4%)                                 |
| >6 bottles                                  | 5 / 373 (1.3%)                | 1 / 58 (1.7%)                       | 4 / 315 (1.3%)                           | 0 / 26 (0%)                                 | 1 / 237 (0.4%)                                   | 1 / 32 (3.1%)                             | 3 / 78 (3.8%)                                 |
| Refused/Do not know                         | 2 / 373 (0.5%)                | 0 / 58 (0%)                         | 2 / 315 (0.6%)                           | 0 / 26 (0%)                                 | 0 / 237 (0%)                                     | 0 / 32 (0%)                               | 2 / 78 (2.6%)                                 |



| <b>ED Demographics by Injury Status and Gender</b>    | <b>Overall,<br/>N = 374<sup>1</sup></b> | <b>Injury Patients<br/>N = 59<sup>1</sup></b> | <b>Non-Injury Patients<br/>N = 315<sup>1</sup></b> | <b>Female Injury Patients,<br/>N = 26<sup>1</sup></b> | <b>Female Non-Injury Patients,<br/>N = 237<sup>1</sup></b> | <b>Male Injury Patients,<br/>N = 33<sup>1</sup></b> | <b>Male Non-Injury Patients,<br/>N = 78<sup>1</sup></b> |
|-------------------------------------------------------|-----------------------------------------|-----------------------------------------------|----------------------------------------------------|-------------------------------------------------------|------------------------------------------------------------|-----------------------------------------------------|---------------------------------------------------------|
| <b>Weekly Alcohol Expenses (TZS), missing: 1</b>      |                                         |                                               |                                                    |                                                       |                                                            |                                                     |                                                         |
| 0-10000                                               | 284 / 373 (76%)                         | 38 / 58 (66%)                                 | 246 / 315 (78%)                                    | 21 / 26 (81%)                                         | 200 / 237 (84%)                                            | 17 / 32 (53%)                                       | 46 / 78 (59%)                                           |
| 10001-50000                                           | 79 / 373 (21%)                          | 19 / 58 (33%)                                 | 60 / 315 (19%)                                     | 5 / 26 (19%)                                          | 35 / 237 (15%)                                             | 14 / 32 (44%)                                       | 25 / 78 (32%)                                           |
| 50001-100000                                          | 7 / 373 (1.9%)                          | 1 / 58 (1.7%)                                 | 6 / 315 (1.9%)                                     | 0 / 26 (0%)                                           | 2 / 237 (0.8%)                                             | 1 / 32 (3.1%)                                       | 4 / 78 (5.1%)                                           |
| Refused/Do not know                                   | 3 / 373 (0.8%)                          | 0 / 58 (0%)                                   | 3 / 315 (0.9%)                                     | 0 / 26 (0%)                                           | 0 / 237 (0%)                                               | 0 / 32 (0%)                                         | 3 / 78 (3.8%)                                           |
| <b>Attempted Quitting, missing: 1</b>                 |                                         |                                               |                                                    |                                                       |                                                            |                                                     |                                                         |
| No                                                    | 170 / 373 (46%)                         | 29 / 59 (49%)                                 | 141 / 314 (45%)                                    | 15 / 26 (58%)                                         | 113 / 236 (48%)                                            | 14 / 33 (42%)                                       | 28 / 78 (36%)                                           |
| Refused/Do not know                                   | 12 / 373 (3.2%)                         | 2 / 59 (3.4%)                                 | 10 / 314 (3.2%)                                    | 0 / 26 (0%)                                           | 1 / 236 (0.4%)                                             | 2 / 33 (6.1%)                                       | 9 / 78 (12%)                                            |
| Yes                                                   | 191 / 373 (51%)                         | 28 / 59 (47%)                                 | 163 / 314 (52%)                                    | 11 / 26 (42%)                                         | 122 / 236 (52%)                                            | 17 / 33 (52%)                                       | 41 / 78 (53%)                                           |
| <b>Reason for Quitting</b>                            |                                         |                                               |                                                    |                                                       |                                                            |                                                     |                                                         |
| Family                                                | 13 / 191 (6.8%)                         | 3 / 28 (11%)                                  | 10 / 163 (6.1%)                                    | 0 / 11 (0%)                                           | 8 / 122 (6.6%)                                             | 3 / 17 (18%)                                        | 2 / 41 (4.9%)                                           |
| Financial                                             | 19 / 191 (9.9%)                         | 3 / 28 (11%)                                  | 16 / 163 (9.8%)                                    | 1 / 11 (9.1%)                                         | 6 / 122 (4.9%)                                             | 2 / 17 (12%)                                        | 10 / 41 (24%)                                           |
| Health                                                | 66 / 191 (35%)                          | 8 / 28 (29%)                                  | 58 / 163 (36%)                                     | 5 / 11 (45%)                                          | 45 / 122 (37%)                                             | 3 / 17 (18%)                                        | 13 / 41 (32%)                                           |
| Other                                                 | 1 / 191 (0.5%)                          | 0 / 28 (0%)                                   | 1 / 163 (0.6%)                                     | 0 / 11 (0%)                                           | 1 / 122 (0.8%)                                             | 0 / 17 (0%)                                         | 0 / 41 (0%)                                             |
| Personal                                              | 79 / 191 (41%)                          | 11 / 28 (39%)                                 | 68 / 163 (42%)                                     | 4 / 11 (36%)                                          | 56 / 122 (46%)                                             | 7 / 17 (41%)                                        | 12 / 41 (29%)                                           |
| Spiritual                                             | 13 / 191 (6.8%)                         | 3 / 28 (11%)                                  | 10 / 163 (6.1%)                                    | 1 / 11 (9.1%)                                         | 6 / 122 (4.9%)                                             | 2 / 17 (12%)                                        | 4 / 41 (9.8%)                                           |
| Not Applicable                                        | 183 / 374 (43.9%)                       |                                               |                                                    |                                                       |                                                            |                                                     |                                                         |
| <b>Alcohol Use perceived as Unhealthy, missing: 1</b> |                                         |                                               |                                                    |                                                       |                                                            |                                                     |                                                         |
| No                                                    | 86 / 373 (23%)                          | 16 / 59 (27%)                                 | 70 / 314 (22%)                                     | 9 / 26 (35%)                                          | 64 / 236 (27%)                                             | 7 / 33 (21%)                                        | 6 / 78 (7.7%)                                           |
| Refused/Do not know                                   | 4 / 373 (1.1%)                          | 0 / 59 (0%)                                   | 4 / 314 (1.3%)                                     | 0 / 26 (0%)                                           | 4 / 236 (1.7%)                                             | 0 / 33 (0%)                                         | 0 / 78 (0%)                                             |
| Yes                                                   | 283 / 373 (76%)                         | 43 / 59 (73%)                                 | 240 / 314 (77%)                                    | 17 / 26 (65%)                                         | 168 / 236 (71%)                                            | 26 / 33 (79%)                                       | 72 / 78 (92%)                                           |
| <b>Sought Treatment for Alcohol Use, missing: 2</b>   |                                         |                                               |                                                    |                                                       |                                                            |                                                     |                                                         |
| No                                                    | 335 / 372 (90%)                         | 51 / 59 (86%)                                 | 284 / 313 (91%)                                    | 24 / 26 (92%)                                         | 219 / 235 (93%)                                            | 27 / 33 (82%)                                       | 65 / 78 (83%)                                           |
| Refused/Do not know                                   | 1 / 372 (0.3%)                          | 0 / 59 (0%)                                   | 1 / 313 (0.3%)                                     | 0 / 26 (0%)                                           | 1 / 235 (0.4%)                                             | 0 / 33 (0%)                                         | 0 / 78 (0%)                                             |
| Yes                                                   | 36 / 372 (9.7%)                         | 8 / 59 (14%)                                  | 28 / 313 (8.9%)                                    | 2 / 26 (7.7%)                                         | 15 / 235 (6.4%)                                            | 6 / 33 (18%)                                        | 13 / 78 (17%)                                           |
| <b>Sought Psychiatric Treatment, missing: 2</b>       |                                         |                                               |                                                    |                                                       |                                                            |                                                     |                                                         |
| No                                                    | 340 / 372 (91%)                         | 49 / 59 (83%)                                 | 293 / 313 (93%)                                    | 20 / 26 (77%)                                         | 217 / 236 (92%)                                            | 29 / 33 (88%)                                       | 74 / 77 (96%)                                           |
| Refused/Do not know                                   | 1 / 372 (0.3%)                          | 0 / 59 (0%)                                   | 1 / 313 (0.3%)                                     | 0 / 26 (0%)                                           | 1 / 236 (0.4%)                                             | 0 / 33 (0%)                                         | 0 / 77 (0%)                                             |
| Yes                                                   | 31 / 372 (8.3%)                         | 10 / 59 (17%)                                 | 21 / 313 (6.7%)                                    | 6 / 26 (23%)                                          | 18 / 236 (7.6%)                                            | 4 / 33 (12%)                                        | 3 / 77 (3.9%)                                           |
| <b>AUD Status (AUDIT ≥ 8)</b>                         | <b>87 / 374 (23%)</b>                   | <b>22 / 59 (37%)</b>                          | <b>65 / 315 (21%)</b>                              | <b>6 / 26 (23%)</b>                                   | <b>38 / 237 (16%)</b>                                      | <b>16 / 33 (48%)</b>                                | <b>27 / 78 (35%)</b>                                    |

| <b>ED Demographics by Injury Status and Gender</b> | <b>Overall,<br/>N = 374<sup>1</sup></b> | <b>Injury<br/>Patients<br/>N = 59<sup>1</sup></b> | <b>Non-Injury<br/>Patients<br/>N = 315<sup>1</sup></b> | <b>Female Injury<br/>Patients,<br/>N = 26<sup>1</sup></b> | <b>Female Non-<br/>Injury Patients,<br/>N = 237<sup>1</sup></b> | <b>Male Injury<br/>Patients,<br/>N = 33<sup>1</sup></b> | <b>Male Non-<br/>Injury<br/>Patients,<br/>N = 78<sup>1</sup></b> |
|----------------------------------------------------|-----------------------------------------|---------------------------------------------------|--------------------------------------------------------|-----------------------------------------------------------|-----------------------------------------------------------------|---------------------------------------------------------|------------------------------------------------------------------|
| <b>Depression Status<br/>(PHQ-9 ≥ 9)</b>           | 74 / 374 (20%)                          | 5 / 59 (8.5%)                                     | 69 / 315 (22%)                                         | 4 / 26 (15%)                                              | 61 / 237 (26%)                                                  | 1 / 33 (3.0%)                                           | 8 / 78 (10%)                                                     |

<sup>1</sup>Mean (SD); n / N (%)

## 269 Discussion

270 Alcohol use is a leading and growing behavioral risk factor for poor health, injury, and  
271 illness. Especially in low-resource settings, each patient who interfaces with the healthcare  
272 system represents a chance to screen and initiate primary and secondary preventative health  
273 measures (23). This is the first analysis to compare alcohol use and alcohol-related behaviors  
274 between injury and non-injury EMD patients in Moshi, Tanzania, with the goal of describing  
275 opportunities for initiation of screening and intervention opportunities. Our evidence  
276 demonstrates that both injury and non-injury patients in Moshi have high rates of harmful and  
277 hazardous alcohol use, and non-injured patients also have high rates of psychological  
278 comorbidities. These findings indicate future screening and intervention initiatives should focus  
279 on the EMD population as a whole rather than specific injury groups.

280 The data presented has shown that a large proportion of both IPs and NIPs presenting to  
281 KCMC's EMD screened positive for HHD and exhibited unhealthy alcohol use behaviors. While  
282 IPs (37%) overall had a higher prevalence of HHD than NIPs (21%), a higher proportion of NIPs  
283 drank daily or drank 5 or more drinks per sitting than IPs. The higher rate of AUDIT  $\geq 8$  among  
284 IPs likely stems from this group having a higher proportion of males (given males generally  
285 consume more alcohol (16)), and the close association of alcohol use and injuries that prompt  
286 EMD visits (27). For example, previous work by our group has found that 30% of IPs at  
287 KCMC's EMD were ETOH positive upon admission (28). While the literature on alcohol use  
288 among non-injury EMD patients is limited both globally and in Tanzania, one study based in  
289 Belgium found that patients presenting with psychiatric problems had the highest incidence of  
290 being intoxicated compared to other complaints (45). However, as EMDs in Tanzania and  
291 Belgium are vastly different, this finding may not be generalizable to our study population.

292 The rates shown in our analysis are also comparable to or higher than other population-  
293 wide alcohol use estimates in Moshi. In 2008, for example, Mitsunga and Larsen found that the  
294 lowest rates of alcohol abuse in Moshi were in females with partners (7.0%), and the highest  
295 rates in males (22.8%) (CAGE > 2 as the definition of alcohol abuse)(17). Further, AUDIT  
296 screening at an outpatient primary health center in Moshi conducted by Mushi et al. showed that  
297 23.9% of primary care patients reported AUDIT scores  $\geq 8$  (23). When stratifying and comparing  
298 our data to Mushi's estimates by sex, a higher proportion of both EMD IPs and NIPs have HHD  
299 than primary care patients. Mushi et al found that 38.7% of males and 13.1% of females had  
300 AUDIT scores  $\geq 8$  (23). In our data set, 48% of male IPs and 35% of male NIPs had AUDIT  $\geq 8$ ,  
301 and 23% of female IPs and 16% of female NIPs had AUDIT  $\geq 8$ . These direct comparisons  
302 suggest that within Moshi, KCMC EMD patients, both IPs and NIPs, have high proportions of  
303 HHD/ AUDIT $\geq 8$  compared to other local populations, demonstrating an opportunity for  
304 screening and intervention in a high-risk population.

305 In comparing regional data, Kenyatta National Hospital in Nairobi with a more sensitive  
306 AUDIT-C, found 91.5% of male and 8.5% of female EMD IPs screened positive for HHD (46).  
307 Concerningly, our higher AUDIT amongst women compared to this Kenya-based screening  
308 suggests our AUD prevalence might be higher than this Kenya-based data. In comparison to data  
309 from Uganda which found male primary care patients had a 5.8% had AUDIT screen (47), we  
310 found a nearly 6-fold higher male AUDIT screen suggesting a very high concentration of HHD  
311 in KCMC EMD. Across the continent in Ghana, 27% of injured patients in the EMD reported a  
312 history of harmful alcohol use/ AUDIT  $\geq 8$ (48). In both these studies, no comparison was made  
313 to the rates in non-injured patients.

314 As in other settings (49,50), we found our patients have both AUD and other untreated  
315 mental health comorbidities. Overall, 1 in 5 or 20% of patients (8.5% of IPs and 22% of NIPs)  
316 sampled scored  $\geq 9$  on the PHQ9 (screening positive for depression) of which 91% had neither  
317 sought nor received treatment. In comparison to our data, the WHO estimates the prevalence of  
318 depression to be approximately 4.1% within the general population of Tanzania(51) and 5.0%  
319 among the global adult population (52). These depression screenings are five times higher in our  
320 EMD population and four times higher than the global population, highlighting the high mental  
321 health burden this patient group experiences and calls for the expansion of clinical services to  
322 support this high-risk group.

323 Accessing care for mental health disorders is limited by health literacy, stigma, and  
324 knowledge of and availability of services in resource-limited settings both globally and within  
325 Tanzania (53–56). It is unfortunately not surprising that over 90% of our population reports not  
326 seeking (nor obtaining) treatment services for either mental health or alcohol treatment services.  
327 The Tanzanian government’s total expenditure on mental health comprises 4.0 % of the total  
328 government health budget, and there are 1.31 total mental health professionals per 100,000  
329 people in Tanzania compared to 15.32 mental health professionals per 100,000 in neighboring  
330 Kenya (57). Aside from a lack of resources, stigma and negative perceptions about mental health  
331 can limit patients seeking care. Within this already resource-strained setting, a KCMC-based  
332 study found that 71% of providers either devalued or discriminated against their patients who  
333 suffered from alcohol use disorders (58). Another study performed in Domoda, Tanzania,  
334 showed that 58.9% of the surveyed population had negative attitudes toward people with mental  
335 health problems (59). These stigmatizing perceptions and generalizations about Tanzanians with

336 mental health problems and substance use (including alcohol) will continue to limit cultural  
337 acceptance of seeking care.

338         Given the high rates of unhealthy alcohol use and mental health disorders found among  
339 our KCMC EMD IPs and NIPs, there is an opportunity to improve screening and treatment  
340 initiation for a more comprehensive screening system. The implementation of high-risk alcohol  
341 use screening within LMICs like Tanzania has been recommended as a way to reduce alcohol-  
342 related harm (60). The Screening, Brief Intervention (BI), and Referral to Treatment (SBIRT)  
343 model, in particular, is the most commonly implemented patient-level alcohol-reduction  
344 intervention in LMICs (61). SBIRT screens patients for substance misuse, and for those  
345 identified as needing further treatment, provides a BI, which is a short motivational interview  
346 focused on increasing awareness of patients' substance misuse and inciting positive behavioral  
347 changes (62,63). BIs have been shown to effectively reduce alcohol intake and related  
348 consequences, especially among injury patients using comparatively few resources that would be  
349 scarce in LMIC settings (64–67). Kenya and South Africa stand as the only other countries on  
350 the African continent to have successfully used alcohol abuse SBIRT programs to their  
351 EMDs(68), however, with an exclusive focus on IPs instead of the full EMD patient population.  
352 KCMC is another institution that has implemented similar services among EMD IPs in recent  
353 research-based intervention initiatives (29,30).

354         However, because alcohol use and psychiatric disorders are present at high rates in our  
355 study population and are commonly co-occurring (8), initiating both psychological and substance  
356 misuse-based screenings among all-comers in this setting represents an opportunity to better  
357 assist disordered patients as a whole. Similar models could be translated to this setting with a  
358 limited increase in resource utilization as basic screening measures are already being utilized

359 among EMD IPs. As seen in this KCMC EMD population, a high prevalence of alcohol use and  
360 mental health disorders was found regardless of their injury status. Implementing screening  
361 measures for both excessive alcohol consumption and depression at this clinical site could both  
362 increase the identification of patients with high-risk alcohol and mental health needs and  
363 subsequently facilitate the delivery of appropriate treatments for high-risk patients. Expanding  
364 the scope of these current measures to incorporate NIPs at KCMC and screening for depression  
365 could lead to improved health outcomes for more patients without having to expend significantly  
366 more resources.

367 In summary, both IPs and NIPs presenting to KCMC's EMD in Moshi, Tanzania, have  
368 higher rates of alcohol use disorder and depression than the general population. Given the heavy  
369 detrimental effects these disorders have on patient health outcomes, more robust screening and  
370 treatment services are needed at KCMC's EMD.

## 371 Strengths and Limitations

372 Several important factors must be taken into account when interpreting this data. First,  
373 we have no complete registry of all patients who present for services and, as such, our ability to  
374 evaluate how representative this sample is of KCMC's EMD population as a whole is limited.  
375 While this limitation is offset by our large sample size and systematic random sampling strategy,  
376 it should still be taken into consideration when considering data accuracy. Second, our data set  
377 has limited specifications on patients' chief complaints which restricts our ability to further  
378 analyze or make comparisons between complaint-specific groups. Therefore, we recommend that  
379 future studies look more closely at EMD patients' demographics and chief complaints in  
380 combination with their alcohol behavior as it might vary greatly with each unique setting.

381 This data was also collected throughout several waves of the COVID-19 pandemic. The  
382 limited resources available to protect KCMC's EMD patients from the spread of COVID-19 may  
383 have dissuaded those with lower acuity complaints from seeking care at the EMD. Therefore, the  
384 data here may represent a more acute patient population than would otherwise be seen. Finally,  
385 the data collected from participants was dependent upon the accuracy of their self-reported  
386 demographic and alcohol intake. While several measures were taken throughout the study to  
387 encourage truthful reporting of patients' typical alcohol intake (including gender-matching data  
388 collectors with participants and collecting all data in private, confidential environments), there  
389 may have been an underreporting of true alcohol consumption. This may be due to the societal  
390 stigmatization surrounding heavy alcohol use in Tanzania, which encourages secretive alcohol  
391 use behaviors, especially among females.

392 More research is needed to better identify treatments that would be effective for all EMD  
393 patients presenting with unhealthy alcohol use. Building upon the information presented here, to  
394 reduce the burden caused by alcohol in this region, more effective, evidence-based care options  
395 are urgently needed.

## 396 Conclusion

397 Of all patients who presented to KCMC's EMD, we found that 37% of IP and 21% of  
398 NIPs scored  $\geq 8$  on the AUDIT. As this score is clinically significant for hazardous or harmful  
399 alcohol use, our findings suggest that a significant proportion of both patient populations could  
400 benefit from an EMD-based alcohol treatment and referral process to reduce this growing  
401 behavioral risk factor. This is especially important given the lack of alcohol-related treatment  
402 options and trained personnel in this region. We hope that this data can be used to shape and  
403 inform research and treatment programs related to alcohol and reduce the burden of use in



404 Moshi, Tanzania.

## 405 Funding Disclosure

406 This project was funded by the Duke Global Health Institute Graduate Student funds, and the

407 Josiah Trent Foundation. Infrastructure built by NIH grant R01 AA027512 (PI Staton) was used

408 to support the data collection process for this grant to understand gender related aspects of

409 alcohol use at KCMC.

## 410 Bibliography

- 411 1. World Health Organization (WHO). Global status report on alcohol and health 2018  
412 [Internet]. World Health Organization (WHO); 2018 [cited 2021 Nov 21]. Available from:  
413 <https://apps.who.int/iris/bitstream/handle/10665/274603/9789241565639-eng.pdf>
- 414 2. Rehm J, Gmel GE, Gmel G, Hasan OSM, Imtiaz S, Popova S, et al. The relationship  
415 between different dimensions of alcohol use and the burden of disease-an update.  
416 *Addiction*. 2017 Jun;112(6):968–1001.
- 417 3. Rehm J, Mathers C, Popova S, Thavorncharoensap M, Teerawattananon Y, Patra J. Global  
418 burden of disease and injury and economic cost attributable to alcohol use and alcohol-use  
419 disorders. *Lancet*. 2009 Jun 27;373(9682):2223–33.
- 420 4. Sterling SA, Palzes VA, Lu Y, Kline-Simon AH, Parthasarathy S, Ross T, et al.  
421 Associations between medical conditions and alcohol consumption levels in an adult  
422 primary care population. *JAMA Netw Open*. 2020 May 1;3(5):e204687.
- 423 5. Schwarzinger M, Thiébaud SP, Baillot S, Mallet V, Rehm J. Alcohol use disorders and  
424 associated chronic disease - a national retrospective cohort study from France. *BMC*  
425 *Public Health*. 2017 Jul 21;18(1):43.
- 426 6. Runggay H, Murphy N, Ferrari P, Soerjomataram I. Alcohol and cancer: epidemiology and  
427 biological mechanisms. *Nutrients*. 2021 Sep 11;13(9).
- 428 7. Piano MR. Alcohol's effects on the cardiovascular system. *Alcohol Res*. 2017;38(2):219–  
429 41.
- 430 8. McHugh RK, Weiss RD. Alcohol use disorder and depressive disorders. *Alcohol Res*.  
431 2019 Oct 21;40(1).
- 432 9. Puddephatt J-A, Irizar P, Jones A, Gage SH, Goodwin L. Associations of common mental  
433 disorder with alcohol use in the adult general population: a systematic review and meta-  
434 analysis. *Addiction*. 2022 Jun;117(6):1543–72.
- 435 10. Steele CM, Southwick L. Alcohol and social behavior I: The psychology of drunken  
436 excess. *J Pers Soc Psychol*. 1985 Jan;48(1):18–34.
- 437 11. Thavorncharoensap M, Teerawattananon Y, Yothasamut J, Lertpitakpong C,  
438 Chaikledkaew U. The economic impact of alcohol consumption: a systematic review.  
439 *Subst Abuse Treat Prev Policy*. 2009 Nov 25;4:20.
- 440 12. Burke TR. The economic impact of alcohol abuse and alcoholism. *Public Health Rep*.  
441 1988 Dec;103(6):564–8.
- 442 13. Mohapatra S, Patra J, Popova S, Duhig A, Rehm J. Social cost of heavy drinking and  
443 alcohol dependence in high-income countries. *Int J Public Health*. 2010 Jun;55(3):149–57.
- 444 14. Manthey J, Hassan SA, Carr S, Kilian C, Kuitunen-Paul S, Rehm J. What are the

- 445 economic costs to society attributable to alcohol use? A systematic review and modelling  
446 study. *Pharmacoeconomics*. 2021 Jul;39(7):809–22.
- 447 15. GBD 2016 Alcohol and Drug Use Collaborators. The global burden of disease attributable  
448 to alcohol and drug use in 195 countries and territories, 1990-2016: a systematic analysis  
449 for the Global Burden of Disease Study 2016. *Lancet Psychiatry*. 2018 Dec;5(12):987–  
450 1012.
- 451 16. GBD 2016 Alcohol Collaborators. Alcohol use and burden for 195 countries and  
452 territories, 1990-2016: a systematic analysis for the Global Burden of Disease Study 2016.  
453 *Lancet*. 2018 Sep 22;392(10152):1015–35.
- 454 17. Mitsunaga T, Larsen U. Prevalence of and risk factors associated with alcohol abuse in  
455 Moshi, northern Tanzania. *J Biosoc Sci*. 2008 May;40(3):379–99.
- 456 18. Casey ER, Muro F, Thielman NM, Maya E, Ossmann EW, Hocker MB, et al. Analysis of  
457 traumatic injuries presenting to a referral hospital emergency department in Moshi,  
458 Tanzania. *Int J Emerg Med*. 2012 Jun 8;5(1):28.
- 459 19. Staton CA, Msilanga D, Kiwango G, Vissoci JR, de Andrade L, Lester R, et al. A  
460 prospective registry evaluating the epidemiology and clinical care of traumatic brain  
461 injury patients presenting to a regional referral hospital in Moshi, Tanzania: challenges  
462 and the way forward. *Int J Inj Contr Saf Promot*. 2017 Mar;24(1):69–77.
- 463 20. Staton CA, Zhao D, Ginalis EE, Hirshon JM, Sakita F, Swahn MH, et al. Alcohol  
464 Availability, Cost, Age of First Drink, and Its Association with At-Risk Alcohol Use in  
465 Moshi, Tanzania. *Alcohol Clin Exp Res*. 2020 Nov 10;44(11):2266–74.
- 466 21. Castens V, Luinga F, Shayo B, Tolia C. Alcohol Abuse in Urban Moshi, Tanzania.  
467 2012;
- 468 22. Francis JM, Weiss HA, Mshana G, Baisley K, Grosskurth H, Kapiga SH. The  
469 Epidemiology of Alcohol Use and Alcohol Use Disorders among Young People in  
470 Northern Tanzania. *PLoS ONE*. 2015 Oct 7;10(10):e0140041.
- 471 23. Mushi D, Moshiro C, Hanlon C, Francis JM, Teferra S. Missed opportunity for alcohol  
472 use disorder screening and management in primary health care facilities in northern rural  
473 Tanzania: a cross-sectional survey. *Subst Abuse Treat Prev Policy*. 2022 Jul 6;17(1):50.
- 474 24. Chikritzhs T, Livingston M. Alcohol and the risk of injury. *Nutrients*. 2021 Aug 13;13(8).
- 475 25. Brumback T, Cao D, McNamara P, King A. Alcohol-induced performance impairment: a  
476 5-year re-examination study in heavy and light drinkers. *Psychopharmacology (Berl)*.  
477 2017 Jun;234(11):1749–59.
- 478 26. Tzambazis K, Stough C. Alcohol impairs speed of information processing and simple and  
479 choice reaction time and differentially impairs higher-order cognitive abilities. *Alcohol*  
480 *Alcohol*. 2000;35(2):197–201.

- 481 27. Alcohol and Injury in Emergency Departments: Summary of the Report from the WHO  
482 Collaborative Study on Alcohol and Injuries. Geneva, Switzerland: World Health  
483 Organization; 2007.
- 484 28. Staton CA, Vissoci JRN, Toomey N, Abdelgadir J, Chou P, Haglund M, et al. The impact  
485 of alcohol among injury patients in Moshi, Tanzania: a nested case-crossover study. *BMC*  
486 *Public Health*. 2018 Feb 21;18(1):275.
- 487 29. PRACT to Investigate Controlling Alcohol Related Harms in a Low-Income Setting;  
488 Emergency Department BIs in Tanzania - Full Text View - ClinicalTrials.gov [Internet].  
489 [cited 2022 Dec 28]. Available from:  
490 [https://clinicaltrials.gov/ct2/show/NCT04535011?term=alcohol+AND+tanzania&draw=2](https://clinicaltrials.gov/ct2/show/NCT04535011?term=alcohol+AND+tanzania&draw=2&rank=2)  
491 [&rank=2](https://clinicaltrials.gov/ct2/show/NCT04535011?term=alcohol+AND+tanzania&draw=2&rank=2)
- 492 30. Staton CA, Zadey S, O’Leary P, Phillips A, Minja L, Swahn MH, et al. PRACT: a  
493 pragmatic randomized adaptive clinical trial protocol to investigate a culturally adapted  
494 brief negotiational intervention for alcohol use in the emergency department in Tanzania.  
495 *Trials*. 2022 Feb 5;23(1):120.
- 496 31. WHO. Alcohol and Injury in Emergency Departments. World Health Organization. 2007;
- 497 32. Meier BJ, El-Gabri D, Friedman K, Mvungi M, Mmbaga BT, Nickenig Vissoci JR, et al.  
498 Perceptions of alcohol use among injury patients and their family members in Tanzanian  
499 society. *Alcohol*. 2020 Mar;83:9–15.
- 500 33. Skipsey K, Burleson JA, Kranzler HR. Utility of the AUDIT for identification of  
501 hazardous or harmful drinking in drug-dependent patients. *Drug Alcohol Depend*. 1997  
502 May 2;45(3):157–63.
- 503 34. Saunders JB, Aasland OG, Babor TF, de la Fuente JR, Grant M. Development of the  
504 Alcohol Use Disorders Identification Test (AUDIT): WHO Collaborative Project on Early  
505 Detection of Persons with Harmful Alcohol Consumption--II. *Addiction*. 1993  
506 Jun;88(6):791–804.
- 507 35. Nadkarni A, Garber A, Costa S, Wood S, Kumar S, MacKinnon N, et al. Auditing the  
508 AUDIT: A systematic review of cut-off scores for the Alcohol Use Disorders  
509 Identification Test (AUDIT) in low- and middle-income countries. *Drug Alcohol Depend*.  
510 2019 Sep 1;202:123–33.
- 511 36. Piccinelli M, Tessari E, Bortolomasi M, Piasere O, Semenzin M, Garzotto N, et al.  
512 Efficacy of the alcohol use disorders identification test as a screening tool for hazardous  
513 alcohol intake and related disorders in primary care: a validity study. *BMJ*. 1997 Feb  
514 8;314(7078):420–4.
- 515 37. Lundin A, Hallgren M, Balliu N, Forsell Y. The use of alcohol use disorders identification  
516 test (AUDIT) in detecting alcohol use disorder and risk drinking in the general population:  
517 validation of AUDIT using schedules for clinical assessment in neuropsychiatry. *Alcohol*

- 518 Clin Exp Res. 2015 Jan;39(1):158–65.
- 519 38. Conigrave KM, Hall WD, Saunders JB. The AUDIT questionnaire: choosing a cut-off  
520 score. Alcohol Use Disorder Identification Test. Addiction. 1995 Oct;90(10):1349–56.
- 521 39. Vissoci JRN, Hertz J, El-Gabri D, Andrade Do Nascimento JR, Pestillo De Oliveira L,  
522 Mmbaga BT, et al. Cross-Cultural Adaptation and Psychometric Properties of the AUDIT  
523 and CAGE Questionnaires in Tanzanian Swahili for a Traumatic Brain Injury Population.  
524 Alcohol Alcohol. 2018 Jan 1;53(1):112–20.
- 525 40. Miller WR, Tonigan JS, Longabaugh R. The Drinker Inventory of Consequences (DrInC).  
526 American Psychological Association (APA). 1995;
- 527 41. Forcehimes AA, Tonigan JS, Miller WR, Kenna GA, Baer JS. Psychometrics of the  
528 drinker inventory of consequences (drinc). Addict Behav. 2007 Aug;32(8):1699–704.
- 529 42. Kroenke K, Spitzer RL, Williams JB. The PHQ-9: validity of a brief depression severity  
530 measure. J Gen Intern Med. 2001 Sep;16(9):606–13.
- 531 43. Smith Fawzi MC, Ngakongwa F, Liu Y, Rutayuga T, Siril H, Somba M, et al. Validating  
532 the Patient Health Questionnaire-9 (PHQ-9) for screening of depression in Tanzania.  
533 Neurol Psychiatry Brain Res. 2019 Feb;31:9–14.
- 534 44. Zhao D, Staton CA, He Q, Mmbaga BT, Vissoci JRN. Cross-Culture Adaptation and  
535 Psychometric Properties of the DrInC Questionnaire in Tanzanian Swahili. Front Public  
536 Health. 2018 Nov 20;6:330.
- 537 45. Calle PA, Damen J, De Paepe P, Monsieurs KG, Buylaert WA. A survey on alcohol and  
538 illicit drug abuse among emergency department patients. Acta Clin Belg. 2006  
539 Aug;61(4):188–95.
- 540 46. Lee JA, Ochola EO, Sugut J, Ngila B, Ojuka DK, Mello MJ, et al. Assessment of  
541 substance use among injured persons seeking emergency care in Nairobi, Kenya. Afr J  
542 Emerg Med. 2022 Dec;12(4):321–6.
- 543 47. Nalwadda O, Rathod SD, Nakku J, Lund C, Prince M, Kigozi F. Alcohol use in a rural  
544 district in Uganda: findings from community-based and facility-based cross-sectional  
545 studies. Int J Ment Health Syst. 2018 Apr 3;12:12.
- 546 48. Gardner A, Forson PK, Oduro G, Djan D, Adu KO, Ofori-Anti K, et al. Harmful alcohol  
547 use among injured adult patients presenting to a Ghanaian emergency department. Inj  
548 Prev. 2017 Jun;23(3):190–4.
- 549 49. Shield KD, Parry C, Rehm J. Chronic diseases and conditions related to alcohol use.  
550 Alcohol Res. 2013;35(2):155–73.
- 551 50. Zewdu S, Hanlon C, Fekadu A, Medhin G, Teferra S. Treatment gap, help-seeking, stigma  
552 and magnitude of alcohol use disorder in rural Ethiopia. Subst Abuse Treat Prev Policy.  
553 2019 Jan 18;14(1):4.

- 554 51. World Health Organization. Depression and Other Common Mental Disorders: Global  
555 Health Estimates. Geneva: WHO; 2017.
- 556 52. WHO. Depression [Internet]. World Health Organization. 2021 [cited 2023 Jan 6].  
557 Available from: <https://www.who.int/news-room/fact-sheets/detail/depression>
- 558 53. Saxena S, Thornicroft G, Knapp M, Whiteford H. Resources for mental health: scarcity,  
559 inequity, and inefficiency. *Lancet*. 2007 Sep 8;370(9590):878–89.
- 560 54. Muhorakeye O, Biracyaza E. Exploring barriers to mental health services utilization at  
561 kabutare district hospital of rwanda: perspectives from patients. *Front Psychol*. 2021 Mar  
562 22;12:638377.
- 563 55. Wainberg ML, Scorza P, Shultz JM, Helpman L, Mootz JJ, Johnson KA, et al. Challenges  
564 and Opportunities in Global Mental Health: a Research-to-Practice Perspective. *Curr*  
565 *Psychiatry Rep*. 2017 May;19(5):28.
- 566 56. Ambikile JS, Iseselo MK. Mental health care and delivery system at Temeke hospital in  
567 Dar es Salaam, Tanzania. *BMC Psychiatry*. 2017 Mar 23;17(1):109.
- 568 57. WHO. Mental Health Atlas 2014. World Health Organization. 2014;
- 569 58. Staton CA, Vissoci JRN, Wojcik R, Hirshon JM, Mvungi M, Mmbaga BT, et al.  
570 Perceived barriers by health care providers for screening and management of excessive  
571 alcohol use in an emergency department of a low-income country. *Alcohol*. 2018  
572 Sep;71:65–73.
- 573 59. Community Knowledge, Attitudes and Perception towards Mental Illness in Dodoma  
574 Municipality, Tanzania. *ARC J Public Health Community Med*. 2016;1(3).
- 575 60. Benegal V, Chand PK, Obot IS. Packages of care for alcohol use disorders in low- and  
576 middle-income countries. *PLoS Med*. 2009 Oct 27;6(10):e1000170.
- 577 61. Staton CA, Vissoci JRN, El-Gabri D, Adewumi K, Concepcion T, Elliott SA, et al.  
578 Patient-level interventions to reduce alcohol-related harms in low- and middle-income  
579 countries: A systematic review and meta-summary. *PLoS Med*. 2022 Apr  
580 12;19(4):e1003961.
- 581 62. Chapter 1—Introduction to Brief Interventions and Therapies - Brief Interventions and  
582 Brief Therapies for Substance Abuse - NCBI Bookshelf [Internet]. [cited 2021 Feb 8].  
583 Available from: <https://www.ncbi.nlm.nih.gov/books/NBK64950/>
- 584 63. Bien TH, Miller WR, Tonigan JS. Brief interventions for alcohol problems: a review.  
585 *Addiction*. 1993 Mar;88(3):315–35.
- 586 64. Pringle JL, Rickard-Aasen S, Slain T, Venkat A. Implementation of screening, brief  
587 intervention, and referral to treatment (SBIRT) in the emergency department without  
588 additional resources. *Addict Sci Clin Pract*. 2013 Sep;8(S1).

- 589 65. Gentilello LM, Rivara FP, Donovan DM, Jurkovich GJ, Daranciang E, Dunn CW, et al.  
590 Alcohol interventions in a trauma center as a means of reducing the risk of injury  
591 recurrence. *Ann Surg*. 1999 Oct;230(4):473–80; discussion 480.
- 592 66. Fleming MF, Barry KL, Manwell LB, Johnson K, London R. Brief physician advice for  
593 problem alcohol drinkers. A randomized controlled trial in community-based primary care  
594 practices. *JAMA*. 1997 Apr 2;277(13):1039–45.
- 595 67. D’Onofrio G, Fiellin DA, Pantalon MV, Chawarski MC, Owens PH, Degutis LC, et al. A  
596 brief intervention reduces hazardous and harmful drinking in emergency department  
597 patients. *Ann Emerg Med*. 2012 Aug;60(2):181–92.
- 598 68. van der Westhuizen C, Myers B, Malan M, Naledi T, Roelofse M, Stein DJ, et al.  
599 Implementation of a screening, brief intervention and referral to treatment programme for  
600 risky substance use in South African emergency centres: A mixed methods evaluation  
601 study. *PLoS ONE*. 2019 Nov 15;14(11):e0224951.
